# Supplementary material
Source: PubMed Central journal article supplement (PMC2718343)
Supplement: 0901647106_0901647106SI.pdf [file 0901647106_0901647106SI.pdf]

# Supporting Information

Das et al. 10.1073/pnas.0901647106

## SI Methods

**Decidualization.** Experimentally induced decidualization was performed in non-pregnant mice as described in ref. 6 of the main article. Mice were ovariectomized and 14 d later were s.c. injected with E (2  $\mu\text{g}/\text{kg}$  body weight) in 0.1 mL of sesame oil for 3 consecutive days. This was followed by daily injections of P (40 mg/kg body weight) for 3 consecutive days. Decidualization was then initiated in one horn by injection of 20  $\mu\text{L}$  oil. The other horn was left unstimulated. The animals were treated with P or P plus letrozole for an additional 3 d following decidual stimulation and then killed to collect the uterine tissue.

**LCM.** Sections of uteri collected on d 4, 5, and 6 of pregnancy were subjected to LCM. Frozen sections (10  $\mu\text{m}$ ) containing the implantation sites were placed on polyethylene naphthalate membrane slides (Molecular Devices) and dehydrated in ethanol and xylene. Using the Veritas microdissection instrument, the mesometrial and anti-mesometrial regions were excised and the decidual tissues were obtained. RNA was isolated from these tissues using a Pico Pure RNA isolation kit according to the manufacturer's instructions. cDNA was synthesized from the isolated RNA using the Sensiscript reverse transcriptase kit (Qiagen) and subjected to real-time PCR using gene-specific primers.

**Microarray Analysis.** Mice were treated with or without letrozole and subjected to experimentally induced decidualization. Uteri were collected from untreated or treated animals at 72 h following the application of decidual stimulus ( $n = 5$ ). Total RNA was prepared from these tissues and subjected to microarray analyses using Affymetrix mouse arrays (GeneChip mouse genome 430 2.0 array) following the Affymetrix protocol as described previously (1).

**Real-Time PCR.** These assays were performed as described in ref. 9 of the main article. The expression of 36B4 mRNA, encoding a ribosomal protein, was used to normalize the variability of mRNA amounts in the RNA samples analyzed.

**Immunohistochemistry.** Immunohistochemistry was performed as described in ref. 6 of the main article.

**Assay of Aromatase Activity.** The aromatase activity in uterine and ovarian homogenates was determined by the tritiated water release assay as described previously (2). Briefly, 250  $\mu\text{L}$  of uterine or ovarian homogenates was incubated with 300 pmol of [ $1\beta$ - $^3\text{H}$ ]androstenedione for 6 h at 37 C. The results were calculated as fmol of [ $^3\text{H}$ ]water released per 24 h per milligram of tissue. Aromatase activity is expressed as mean  $\pm$  SEM of data derived from 3 independent experiments.

1. Cheon YP, Li Q, Demayo FJ, Bagchi IC, Bagchi MK (2002) A genomic approach to identify novel progesterone receptor-regulated pathways in the uterus during implantation. *Mol Endocrinol* 16:2853–2871.

2. Lephart ED, Simpson ER (1991) Assay of aromatase activity. *Methods Enzymol* 206:477–483.

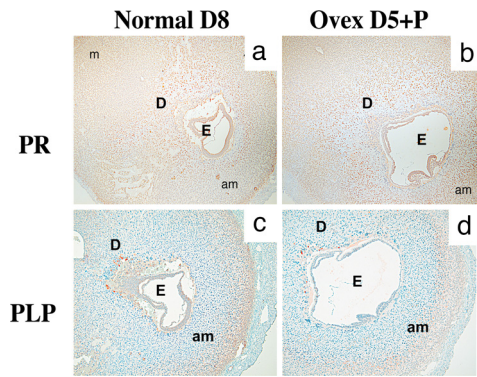

**Fig. S1.** Sections of ovariectomized P-treated D8 and normal D8 uteri were subjected to immunohistochemical analysis using antibodies specific for PR (a and b) and prolactin-like protein type B (*PLP-B*; c and d). The labels am, m, and D denote anti-mesometrial area, mesometrial area, and decidua, respectively; E denotes estrogen.

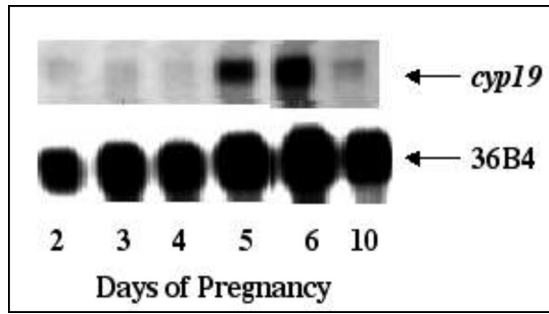

Fig. S2. RNA from d 2 to d 10 of pregnancy was analyzed by Northern blotting with cDNA probes specific for P450 aromatase (*Upper*) and 36B4 (*Lower*).

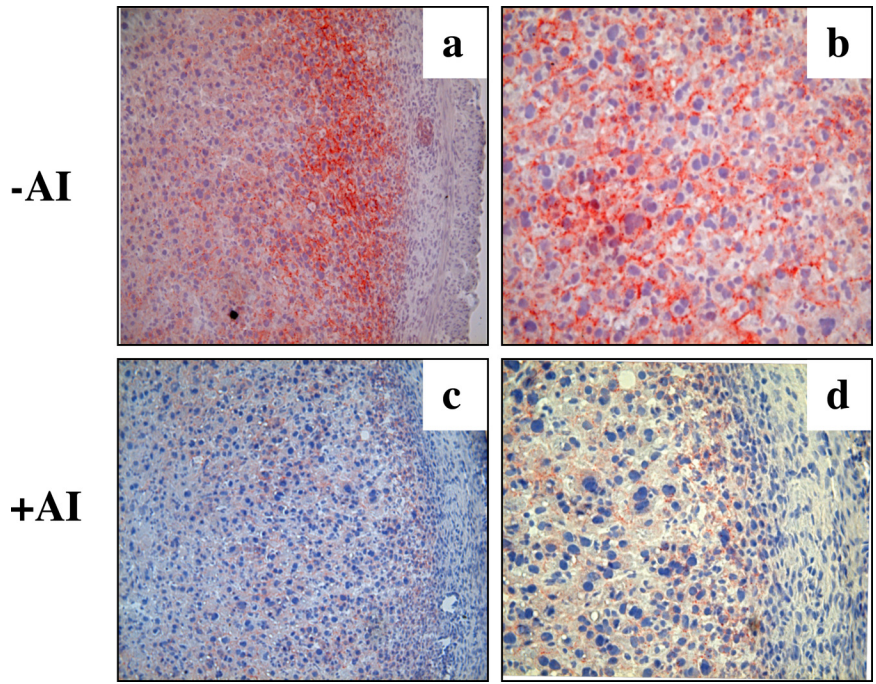

**Fig. S3.** Immunohistochemical analysis of Cx43 in the uterine sections of mice treated with P (panels *a* and *b*) and P plus letrozole (panels *c* and *d*). M indicates mesometrial area.
